# Supplementary material for: Dysferlin Interacts with Histone Deacetylase 6 and Increases alpha-Tubulin Acetylation
Source: PLOS journal article supplement (doi:10.1371/journal.pone.0028563), 2011-12-08
Supplement: S1 (10.1371/journal.pone.0028563.s001) [file journal.pone.0028563.s001]

Supplementary Table S1: Primers used for dysferlin C2 domain deletion constructs

| **Dysferlin C2 deletion**  **construct** | **Deleted residues** | **Sequence of oligonucleotides (oligo)** |
| --- | --- | --- |
| ∆C2A | 1-129 | With 1 oligo  5’-ggcatggacgagctgtacaaggtgcccctgttcccgccccct-3’ |
| ∆C2B | 215-349 | With 2 oligos  Forward: 5’-acatctagaaagctgctgtcagcgcctctggagagaaaagac-3’  Reverse: 5’-ttcagaggggtcttttctctccagaggcgctgacagcagctttct-3’ |
| ∆C2C | 383-515 | With 2 oligos  Forward: 5’-ctgcgaggagcccacttctgccccacttttgggccctgctac-3’  Reverse: 5’-gaggttgatgtagcagggcccaaaagtggggcagaagtgggctcc-3’ |
| ∆C2D | 1135-1265 | With 1 oligo  5’-atgtccgtctccaccttgagcccgtcgggggagctgctggcc-3’ |
| ∆C2E | 1324-1462 | With 2 oligos  Forward: 5’-aacatctacatggttcctcagaaggagcccctcatccccatc-3’  Reverse: 5’-ttcctcctggatggggatgaggggctccttctgaggaaccatgta-3’ |
| ∆C2F | 1561-1700 | With 1 oligo  5’-ctcccagaagacccagccatcctcctccacctcttctgccag-3’ |
| ∆C2G | 1817-1965 | With 2 oligos  Forward: 5’-aggtttttcctgcgttgtattaagggctggtggccctgtgta-3’  Reverse: 5’-ctcttctgctacacagggccaccagcccttaatacaacgcaggaa-3’ |
| DD-DEFG-TM | 1-870 | DD-DEFG-TM cloning: with 2 oligos  Forward: 5’-ccggaattcgctgaggggaagctgtct-3’  Reverse: 5’-aagaatgcggccgcagctgaaggcttcac-3’  eGFP cloning: with 2 oligos  Forward: 5’-aaacttaagcttggtaccgag-3’  Reverse: 5’-cagcatgaattccttgtacag-3’ |
